# Supplementary material for: Field survey of the 2017 Typhoon Hato and a comparison with storm surge modeling in Macau
Source: Copernicus journal article supplement (doi:10.5194/nhess-2018-222), 2018-08-27
Supplement: Supplementary file 1 [file nhess-2018-222-supplement.pdf]

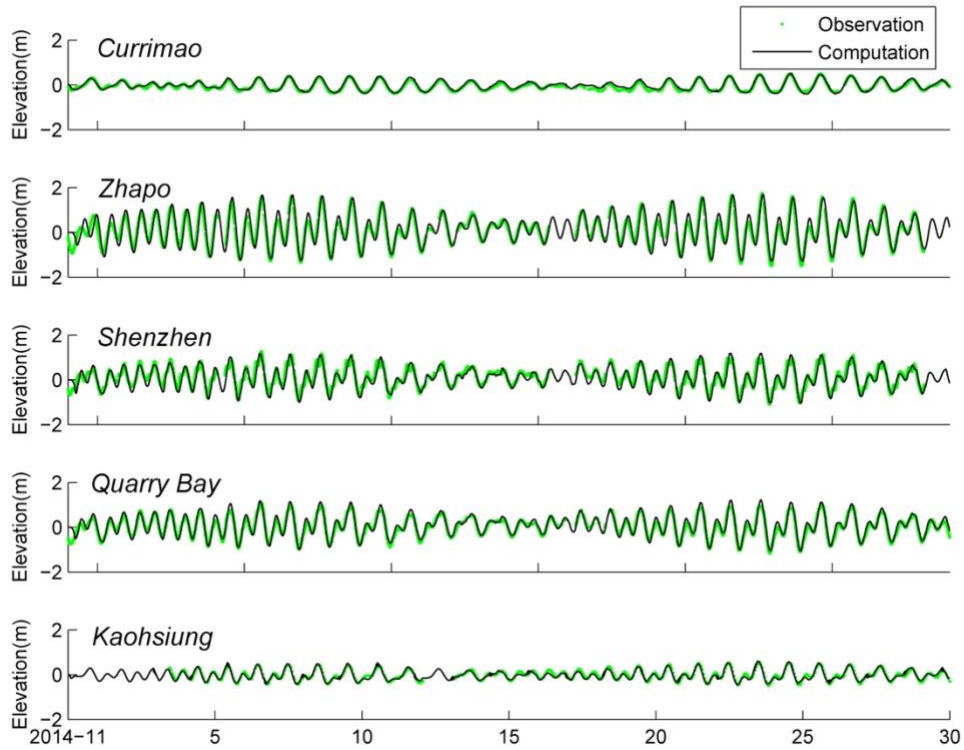

1

2 Figure S1. The comparison between simulated tide and measured tide during 1 Nov – 30 Nov, 2014 at locations  
 3 inside the simulation domain.

4

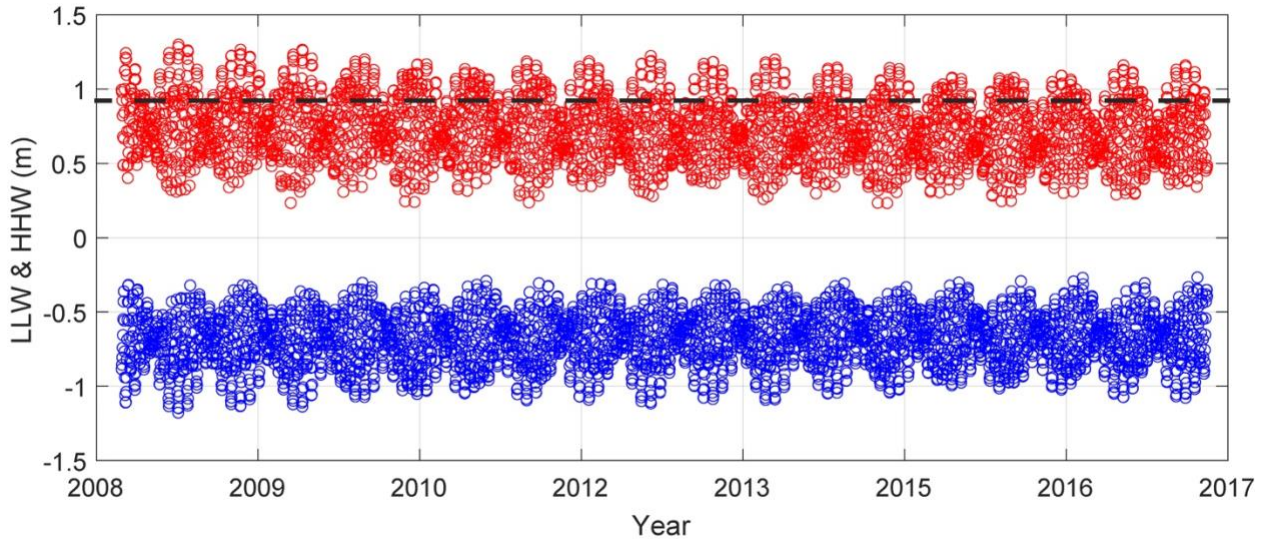

5

6 **Figure S2.** The daily higher high water (HHW) and lower low water (LLW) extracted from the modeled tide at Macau  
 7 tide station during 2008~2017, which shows the 0.927-m peak tide (dashed line) before Hato's landfall is only  
 8 moderately high compared with other HHW values.

Table S1

| Point | Longitude   | Latitude    | Overland flow depth (m) | Data type |
|-------|-------------|-------------|-------------------------|-----------|
| 1     | 113.541473  | 22.209631   | 1.7                     | WM        |
| 2     | 113.540781  | 22.210944   | 1.7                     | WM        |
| 3     | 113.540134  | 22.21102    | 1.7                     | WM        |
| 4     | 113.538845  | 22.210262   | 1.3                     | WM        |
| 5     | 113.53947   | 22.210045   | 1.2                     | WM        |
| 6     | 113.538564  | 22.209913   | 1.0                     | WM, EW    |
| 7     | 113.53806   | 22.209556   | 1.0                     | WM        |
| 8     | 113.536824  | 22.209535   | 1.0                     | WM        |
| 9     | 113.53649   | 22.20933    | 1.2                     | WM, EW    |
| 10    | 113.536722  | 22.208763   | 1.0                     | WM        |
| 11    | 113.536873  | 22.208522   | 1.0                     | WM        |
| 12    | 113.535848  | 22.210609   | 0.5                     | WM, EW    |
| 13    | 113.535539  | 22.21127    | 0.5                     | WM, EW    |
| 14    | 113.53566   | 22.212899   | 1.8                     | WM, EW    |
| 15    | 113.537177  | 22.213231   | 1.7                     | WM        |
| 16    | 113.538159  | 22.213285   | 1.6                     | WM        |
| 17    | 113.539222  | 22.212726   | 1.2                     | WM        |
| 18    | 113.539365  | 22.211505   | 1.1                     | WM        |
| 19    | 113.556552  | 22.193242   | 1.2                     | WM, EW    |
| 20    | 113.556684  | 22.192842   | 1.0                     | WM        |
| 21    | 113.556534  | 22.191471   | 0.5                     | WM        |
| 22    | 113.557618  | 22.190951   | 0.5                     | WM, EW    |
| 23    | 113.557424  | 22.189337   | 0.0                     | WM, EW    |
| 24    | 113.5380556 | 22.19888889 | 1.9                     | WM, EW    |
| 25    | 113.5386439 | 22.19884593 | 2.0                     | EW        |
| 26    | 113.5386111 | 22.19888889 | 0.9                     | WM        |
| 27    | 113.5377778 | 22.19861111 | 2.0                     | WM        |
| 28    | 113.5372222 | 22.19861111 | 2.0                     | WM        |
| 29    | 113.5366667 | 22.19861111 | 2.0                     | WM        |
| 30    | 113.5365381 | 22.19871304 | 2.0                     | WM        |
| 31    | 113.5372222 | 22.19972222 | 3.1                     | EW        |
| 32    | 113.5369444 | 22.20083333 | 1.8                     | WM        |
| 33    | 113.5377778 | 22.20083333 | 1.6                     | WM, EW    |
| 34    | 113.5380556 | 22.20138889 | 1.9                     | WM, EW    |
| 35    | 113.5380556 | 22.20055556 | 0.4                     | WM, EW    |
| 36    | 113.5391667 | 22.20194444 | 1.4                     | WM        |
| 37    | 113.5394444 | 22.20194444 | 0.8                     | WM        |
| 38    | 113.5397222 | 22.20194444 | 0.8                     | WM, EW    |
| 39    | 113.54      | 22.2025     | 1.3                     | WM, EW    |
| 40    | 113.5402778 | 22.20333333 | 1.6                     | WM, EW    |
| 41    | 113.5405556 | 22.20277778 | 1.1                     | WM, EW    |
| 42    | 113.5405556 | 22.20194444 | 1.0                     | WM        |
| 43    | 113.5405556 | 22.20222222 | 1.1                     | WM        |
| 44    | 113.5408333 | 22.20083333 | 1.0                     | WM, EW    |
| 45    | 113.5413889 | 22.20138889 | 1.2                     | WM, EW    |
| 46    | 113.5422482 | 22.20178051 | 0.9                     | WM        |
| 47    | 113.5426002 | 22.2018358  | 1.4                     | WM        |
| 48    | 113.5430732 | 22.2016181  | 0.1                     | WM        |
| 49    | 113.5437806 | 22.2020529  | 0.3                     | WM        |
| 50    | 113.5443439 | 22.20229492 | 1.3                     | WM, EW    |

|     |             |             |     |        |
|-----|-------------|-------------|-----|--------|
| 51  | 113.5448311 | 22.20202487 | 1.1 | WM     |
| 52  | 113.5451083 | 22.2015095  | 0.6 | WM, EW |
| 53  | 113.5458387 | 22.2017806  | 0.5 | WM, EW |
| 54  | 113.5459941 | 22.20165248 | 0.2 | WM     |
| 55  | 113.545996  | 22.20164092 | 0.4 | WM, EW |
| 56  | 113.5466034 | 22.2021301  | 0.3 | WM, EW |
| 57  | 113.5470972 | 22.20238221 | 0.3 | WM, EW |
| 58  | 113.5471585 | 22.20283969 | 0.5 | WM     |
| 59  | 113.5478104 | 22.20264228 | 0.8 | WM, EW |
| 60  | 113.5474604 | 22.20231469 | 0.5 | WM     |
| 61  | 113.5489096 | 22.20226139 | 0.2 | WM     |
| 62  | 113.5483623 | 22.20360816 | 0.4 | WM, EW |
| 63  | 113.5459025 | 22.20457542 | 0.3 | WM     |
| 64  | 113.546245  | 22.2055464  | 0.2 | WM     |
| 65  | 113.5459167 | 22.2056825  | 0.5 | WM     |
| 66  | 113.545646  | 22.20531846 | 0.7 | WM     |
| 67  | 113.5455381 | 22.2051341  | 0.8 | WM, EW |
| 68  | 113.5450626 | 22.20450617 | 0.8 | WM     |
| 69  | 113.5450027 | 22.20484432 | 0.9 | WM     |
| 70  | 113.5448606 | 22.20510605 | 1.1 | WM, EW |
| 71  | 113.5450663 | 22.2056741  | 1.1 | WM, EW |
| 72  | 113.5443201 | 22.20616331 | 1.2 | WM     |
| 73  | 113.5440066 | 22.20580789 | 1.4 | WM     |
| 74  | 113.5434323 | 22.20641919 | 1.3 | EW     |
| 75  | 113.5431074 | 22.20633403 | 1.2 | WM     |
| 76  | 113.5425914 | 22.20719401 | 1.1 | WM     |
| 77  | 113.5421133 | 22.2075409  | 1.4 | WM     |
| 78  | 113.5419605 | 22.20777518 | 1.5 | WM, EW |
| 79  | 113.5413118 | 22.21020199 | 1.7 | WM, EW |
| 80  | 113.5421225 | 22.21226071 | 1.2 | WM     |
| 81  | 113.5423593 | 22.21234218 | 1.0 | WM     |
| 82  | 113.5428442 | 22.21229001 | 1.5 | EW     |
| 83  | 113.5442703 | 22.21118774 | 1.4 | EW     |
| 84  | 113.5447879 | 22.21059626 | 1.3 | WM     |
| 85  | 113.544756  | 22.21053179 | 1.5 | WM     |
| 86  | 113.544567  | 22.20995319 | 1.5 | WM     |
| 87  | 113.5449486 | 22.20848621 | 1.4 | WM     |
| 88  | 113.5460386 | 22.20763212 | 1.0 | WM     |
| 89  | 113.5472765 | 22.20974819 | 1.3 | WM     |
| 90  | 113.5475    | 22.21138889 | 1.1 | WM     |
| 91  | 113.5475    | 22.21194444 | 1.0 | WM     |
| 92  | 113.5475    | 22.2125     | 1.1 | WM     |
| 93  | 113.5475    | 22.21305556 | 0.8 | WM, EW |
| 94  | 113.5480556 | 22.21361111 | 0.4 | WM, EW |
| 95  | 113.5483333 | 22.21333333 | 0.4 | EW     |
| 96  | 113.5363623 | 22.19677296 | 2.1 | WM     |
| 97  | 113.536305  | 22.19600109 | 1.9 | WM     |
| 98  | 113.5353762 | 22.19416749 | 1.4 | WM     |
| 99  | 113.5347608 | 22.19305179 | 2.1 | WM     |
| 100 | 113.5341    | 22.1921     | 2.4 | WM     |
| 101 | 113.5339    | 22.1919     | 2.3 | WM     |
| 102 | 113.5335    | 22.1914     | 2.3 | WM     |
| 103 | 113.533     | 22.1904     | 2.3 | WM     |
| 104 | 113.5314    | 22.1883     | 1.4 | WM     |

|     |               |             |             |        |    |  |
|-----|---------------|-------------|-------------|--------|----|--|
| 105 | 113.5316098   | 22.18765228 | 1.5         | WM     |    |  |
| 106 | 113.5317      | 22.1877     | 1.7         | WM     |    |  |
| 107 | 113.5317591   | 22.18495577 | 1.2         | WM     |    |  |
| 108 | 113.5313602   | 22.18425475 | 1.1         | WM     |    |  |
| 109 | 113.531589    | 22.18543006 | 0.8         | WM     |    |  |
| 110 | 113.5313431   | 22.18564843 | 1.7         | EW     |    |  |
| 111 | 113.5312743   | 22.1866406  | 1.2         | WM     |    |  |
| 112 | 113.5313501   | 22.18770473 | 1.6         | WM     |    |  |
| 113 | 113.5327151   | 22.18833656 | 1.5         | WM     |    |  |
| 114 | 113.5332501   | 22.18879737 | 1.4         | WM     |    |  |
| 115 | 113.5342135   | 22.18897389 | 1.6         | WM, EW |    |  |
| 116 | 113.5348      | 22.1895     | 1.6         | WM     |    |  |
| 117 | 113.5354      | 22.1905     | 1.3         | WM     |    |  |
| 118 | 113.5353      | 22.1902     | 0.6         | EW     |    |  |
| 119 | 113.535       | 22.191      | 0.7         | WM     |    |  |
| 120 | 113.5350692   | 22.19083046 | 0.8         | WM     |    |  |
| 121 | 113.5348      | 22.1913     | 0.8         | WM     |    |  |
| 122 | 113.5344006   | 22.19147555 | 1.0         | WM     |    |  |
| 123 | 113.5344      | 22.1917     | 1.5         | EW     |    |  |
| 124 | 113.5347      | 22.1924     | 1.8         | EW     |    |  |
| 125 |               | 1.9         |             | WM     |    |  |
| 126 | 113.5413955   | 22.20759398 | 1.5         | WM     |    |  |
| 127 | 113.5409549   | 22.20745336 | 1.5         | WM     |    |  |
| 128 | 113.5404819   | 22.20733261 | 1.7         | WM     |    |  |
| 129 | 113.539661    | 22.207129   | 1.1         | WM     |    |  |
| 130 | 113.5391216   | 22.20691512 | 0.7         | WM     |    |  |
| 131 | 113.5389144   | 22.20687507 | 1.1         | EW     |    |  |
| 132 | 113.53771088, | 22.20563093 | 22.20563093 | 1.4    | EW |  |
| 133 | 113.5393111   | 22.20624275 | 0.8         | EW     |    |  |
| 134 | 113.5398156   | 22.20628559 | 0.7         | WM, EW |    |  |
| 135 | 113.5406412   | 22.20603    | 1.6         | WM     |    |  |
| 136 | 113.5412856   | 22.20642385 | 1.3         | WM     |    |  |
| 137 | 113.5418312   | 22.20661859 | 1.4         | WM     |    |  |
| 138 | 113.541813    | 22.206501   | 1.2         | WM     |    |  |
| 139 | 113.542245    | 22.206589   | 1.3         | WM, EW |    |  |
| 140 | 113.5417767   | 22.20588487 | 0.8         | WM     |    |  |
| 141 | 113.5418434   | 22.2051939  | 1.0         | WM     |    |  |
| 142 | 113.5414464   | 22.20463215 | 1.3         | WM     |    |  |
| 143 | 113.5407538   | 22.20488396 | 1.3         | WM, EW |    |  |
| 144 | 113.5389674   | 22.20450387 | 1.0         | WM     |    |  |
| 145 | 113.5378978   | 22.20412771 | 1.3         | WM, EW |    |  |
| 146 | 113.5379727   | 22.20299936 | 2.2         | WM, EW |    |  |
| 147 | 113.5380303   | 22.20256066 | 1.8         | WM     |    |  |
| 148 | 113.5378848   | 22.20231554 | 1.6         | WM     |    |  |
| 149 | 113.5374149   | 22.20242409 | 2.1         | WM     |    |  |
| 150 | 113.5385148   | 22.20260663 | 1.7         | WM, EW |    |  |
| 151 | 113.537514    | 22.195464   | 2.2         | WM     |    |  |
| 152 | 113.538124    | 22.19488297 | 1.9         | WM     |    |  |
| 153 | 113.5386111   | 22.19888889 | 0.0         | EW     |    |  |
| 154 | 113.5380556   | 22.20055556 | 0.0         | EW     |    |  |
| 155 | 113.5430556   | 22.20138889 | 0.0         | EW     |    |  |
| 156 | 113.5433493   | 22.2015523  | 0.0         | EW     |    |  |
| 157 | 113.5459941   | 22.20165248 | 0.0         | EW     |    |  |
| 158 | 113.5467252   | 22.20207399 | 0.0         | EW     |    |  |

|     |             |             |     |        |
|-----|-------------|-------------|-----|--------|
| 159 | 113.5316539 | 22.1870091  | 0.0 | EW     |
| 160 | 113.5354    | 22.1905     | 0.0 | EW     |
| 161 | 113.5353334 | 22.1905218  | 0.0 | EW     |
| 162 | 113.5351    | 22.1911     | 0.0 | EW     |
| 163 | 113.535166  | 22.19166927 | 0.0 | EW     |
| 164 | 113.5484159 | 22.21331806 | 0.0 | EW     |
| 165 | 113.5483623 | 22.20360816 | 0.0 | EW     |
| 166 | 113.5480493 | 22.20236395 | 0.0 | EW     |
| 167 | 113.5450543 | 22.20111579 | 0.0 | EW     |
| 168 | 113.538195  | 22.20121956 | 0.0 | EW     |
| 169 | 113.5348516 | 22.19159    | 0.0 | EW     |
| 170 | 113.5350518 | 22.19090591 | 0.0 | EW     |
| 171 | 113.5354783 | 22.19025069 | 0.0 | EW     |
| 172 | 113.5316539 | 22.1870091  | 0.0 | EW     |
| 173 | 113.5305096 | 22.18344892 | 0.0 | EW     |
| 174 | 113.538408  | 22.198844   | 1.9 | WM     |
| 175 | 113.537852  | 22.198864   | 2.0 | WM     |
| 176 | 113.537148  | 22.198808   | 2.0 | WM     |
| 177 | 113.536517  | 22.198653   | 2.0 | WM, EW |
| 178 | 113.536656  | 22.199151   | 1.8 | WM     |
| 179 | 113.536711  | 22.199423   | 1.8 | WM     |
| 180 | 113.536763  | 22.199782   | 3.1 | WM     |
| 181 | 113.536997  | 22.200825   | 1.8 | WM     |
| 182 | 113.537929  | 22.20079    | 1.7 | WM, EW |
| 183 | 113.538024  | 22.200978   | 1.6 | WM, EW |
| 184 | 113.538109  | 22.201255   | 1.9 | WM, EW |
| 185 | 113.538322  | 22.201198   | 0.5 | WM     |
| 186 | 113.539379  | 22.202028   | 1.4 | WM     |
| 187 | 113.539519  | 22.201827   | 0.8 | WM     |
| 188 | 113.539827  | 22.202504   | 1.3 | WM     |
| 189 | 113.540424  | 22.203084   | 1.5 | WM     |
| 190 | 113.540607  | 22.203061   | 0.0 | WM     |
| 191 | 113.540595  | 22.202639   | 1.0 | WM     |
| 192 | 113.540638  | 22.202215   | 1.0 | WM     |
| 193 | 113.540825  | 22.200951   | 1.0 | WM     |
| 194 | 113.546598  | 22.20237    | 0.3 | WM, EW |
| 195 | 113.546834  | 22.202767   | 0.6 | WM, EW |
| 196 | 113.547459  | 22.203235   | 0.0 | WM     |
| 197 | 113.54981   | 22.206255   | 0.0 | WM     |
| 198 | 113.550295  | 22.206957   | 0.0 | WM     |
| 199 | 113.552105  | 22.206941   | 0.2 | WM, EW |
| 200 | 113.554326  | 22.205257   | 0.0 | WM     |
| 201 | 113.556289  | 22.207948   | 0.0 | WM     |
| 202 | 113.557661  | 22.209637   | 0.0 | WM     |
| 203 | 113.558554  | 22.210521   | 0.0 | WM     |
| 204 | 113.55828   | 22.2103     | 0.0 | WM     |
| 205 | 113.558191  | 22.212237   | 0.0 | WM     |
| 206 | 113.555146  | 22.21344    | 0.0 | WM     |
| 207 | 113.551502  | 22.212487   | 0.0 | WM     |
| 208 | 113.548676  | 22.21398    | 0.7 | WM, EW |
| 209 | 113.54775   | 22.214096   | 0.5 | WM     |
| 210 | 113.547578  | 22.211215   | 1.1 | WM     |
| 211 | 113.547484  | 22.211514   | 1.0 | WM     |
| 212 | 113.54781   | 22.21226    | 1.1 | WM, EW |

|     |            |           |     |        |
|-----|------------|-----------|-----|--------|
| 213 | 113.547453 | 22.213146 | 0.8 | WM     |
| 214 | 113.548103 | 22.213494 | 0.4 | WM     |
| 215 | 113.548215 | 22.213301 | 0.5 | WM     |
| 216 | 113.536785 | 22.196281 | 1.9 | WM     |
| 217 | 113.537358 | 22.19565  | 2.2 | WM, EW |
| 218 | 113.538144 | 22.194977 | 2.0 | WM     |
| 219 | 113.538568 | 22.194589 | 1.5 | WM     |
| 220 | 113.538744 | 22.194418 | 1.2 | WM     |
| 221 | 113.539055 | 22.194126 | 0.4 | WM     |
| 222 | 113.539174 | 22.193976 | 0.0 | WM, EW |
| 223 | 113.538509 | 22.193972 | 1.3 | WM     |
| 224 | 113.538064 | 22.194154 | 1.2 | WM     |
| 225 | 113.538172 | 22.193972 | 1.2 | WM     |
| 226 | 113.538025 | 22.193919 | 0.8 | WM     |
| 227 | 113.53771  | 22.194116 | 1.2 | WM     |
| 228 | 113.537555 | 22.194519 | 1.7 | WM, EW |
| 229 | 113.537628 | 22.194519 | 2.0 | WM     |
| 230 | 113.537409 | 22.195051 | 1.8 | WM     |
| 231 | 113.537056 | 22.195327 | 2.0 | WM     |
| 232 | 113.536773 | 22.195753 | 2.1 | WM, EW |
| 233 | 113.535828 | 22.194517 | 1.9 | WM     |
| 234 | 113.536194 | 22.194339 | 2.2 | WM, EW |
| 235 | 113.536305 | 22.194153 | 1.7 | WM, EW |
| 236 | 113.536497 | 22.194077 | 1.5 | WM     |
| 237 | 113.536623 | 22.194026 | 1.5 | WM     |
| 238 | 113.536831 | 22.193887 | 1.2 | WM     |
| 239 | 113.537068 | 22.193709 | 0.7 | WM     |
| 240 | 113.537171 | 22.193592 | 0.0 | WM, EW |
| 241 | 113.536933 | 22.193365 | 0.9 | WM     |
| 242 | 113.53661  | 22.19285  | 1.0 | WM     |
| 243 | 113.536683 | 22.192475 | 1.4 | WM     |
| 244 | 113.536152 | 22.192855 | 1.4 | WM, EW |
| 245 | 113.535696 | 22.193157 | 1.8 | WM     |
| 246 | 113.535929 | 22.192139 | 1.9 | WM, EW |
| 247 | 113.5356   | 22.192607 | 1.9 | WM     |
| 248 | 113.535379 | 22.192953 | 1.9 | WM     |
| 249 | 113.535331 | 22.193061 | 2.0 | WM     |
| 250 | 113.535075 | 22.19305  | 2.0 | WM     |
| 251 | 113.534272 | 22.1913   | 1.6 | WM     |
| 252 | 113.534633 | 22.191027 | 0.9 | WM     |
| 253 | 113.534588 | 22.189619 | 1.5 | WM, EW |
| 254 | 113.533938 | 22.189998 | 1.6 | WM, EW |
| 255 | 113.533979 | 22.190093 | 1.7 | WM     |
| 256 | 113.532968 | 22.189776 | 1.9 | WM     |
| 257 | 113.532911 | 22.189686 | 1.9 | WM     |
| 258 | 113.5329   | 22.189402 | 1.8 | WM     |
| 259 | 113.532994 | 22.189217 | 1.7 | WM     |
| 260 | 113.533407 | 22.188662 | 1.5 | WM     |
| 261 | 113.533441 | 22.188555 | 1.1 | WM, EW |
| 262 | 113.53823  | 22.196282 | 2.0 | WM     |
| 263 | 113.538535 | 22.196664 | 2.0 | WM     |
| 264 | 113.538103 | 22.196839 | 2.1 | WM     |
| 265 | 113.538778 | 22.196536 | 1.9 | WM     |
| 266 | 113.539099 | 22.196298 | 1.8 | WM     |

|     |            |           |     |        |
|-----|------------|-----------|-----|--------|
| 267 | 113.5395   | 22.196052 | 1.6 | WM     |
| 268 | 113.53973  | 22.195959 | 1.4 | WM     |
| 269 | 113.540123 | 22.195712 | 1.2 | WM     |
| 270 | 113.540286 | 22.195629 | 0.0 | WM, EW |
| 271 | 113.540119 | 22.196138 | 1.3 | WM     |
| 272 | 113.539942 | 22.196588 | 1.5 | WM     |
| 273 | 113.53942  | 22.197172 | 1.5 | WM     |
| 274 | 113.539194 | 22.197368 | 1.6 | WM     |
| 275 | 113.538116 | 22.198393 | 1.4 | WM     |
| 276 | 113.53807  | 22.198669 | 2.0 | WM     |
| 277 | 113.537522 | 22.198772 | 1.9 | WM     |
| 278 | 113.537863 | 22.197759 | 2.0 | WM     |
